# Supplementary material
Source: PubMed Central journal article supplement (PMC3838734)
Supplement: mmc1.pdf [file mmc1.pdf]

## Supporting Material

# A $^2\text{H}$ Solid-State NMR Study of Lipid Clustering by Cationic Antimicrobial and Cell-Penetrating Peptides in Model Bacterial Membranes

Byungsu Kwon<sup>1</sup>, Alan J. Waring<sup>2</sup>, and Mei Hong<sup>1\*</sup>

<sup>1</sup> Department of Chemistry, Iowa State University, Ames, Iowa 50011

<sup>2</sup> Department of Physiology and Biophysics, School of Medicine, University of California, Irvine, California 92697-4560 <sup>3</sup> Department of Medicine, Harbor-UCLA Medical Center, Torrance CA 90502

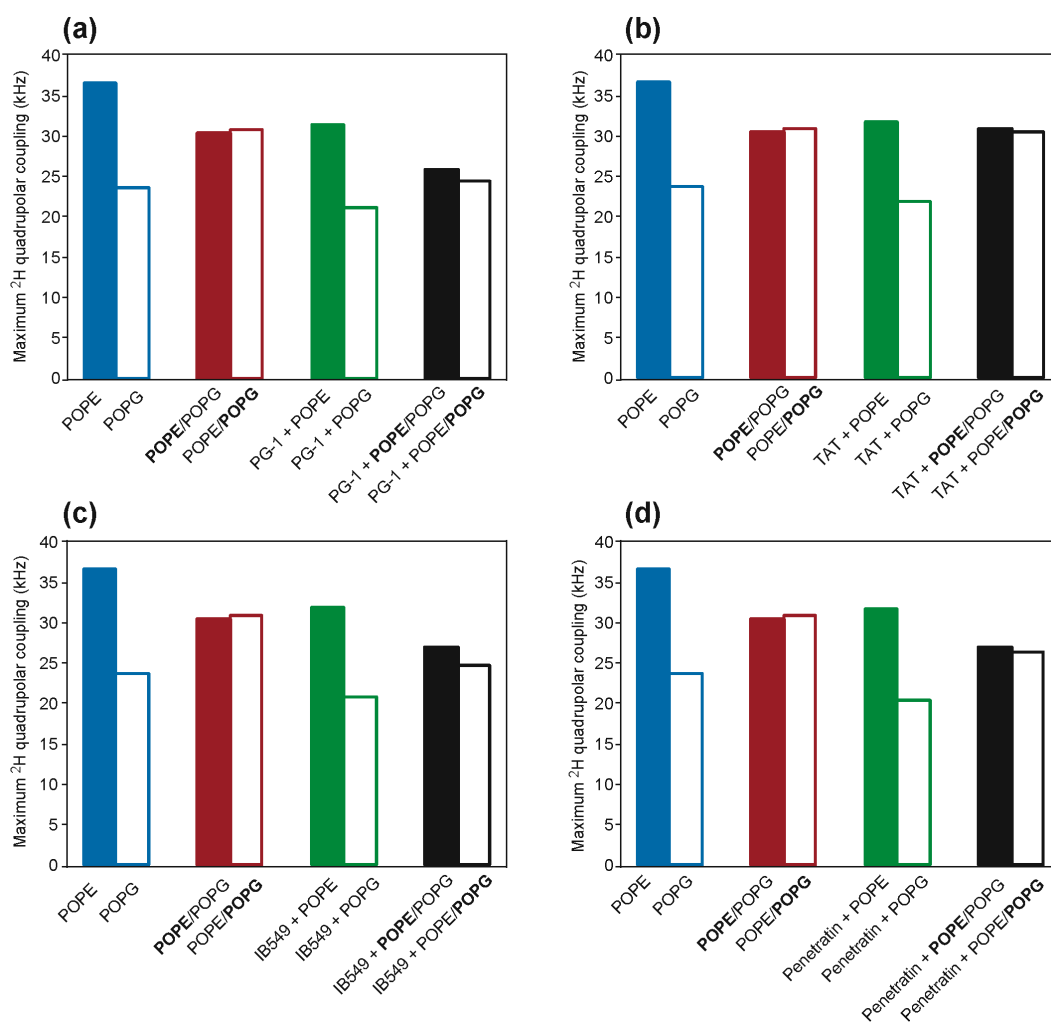

**Figure S1.** Summary of the maximum  $^2\text{H}$  quadrupolar couplings of POPE and POPG in various lipid membranes at 308 K. The peptides are (a) PG-1, (b) TAT, (c) IB549, and (d) Penetratin. Filled and open bars represent the couplings of  $d_{31}$ -POPE and  $d_{31}$ -POPG, respectively.

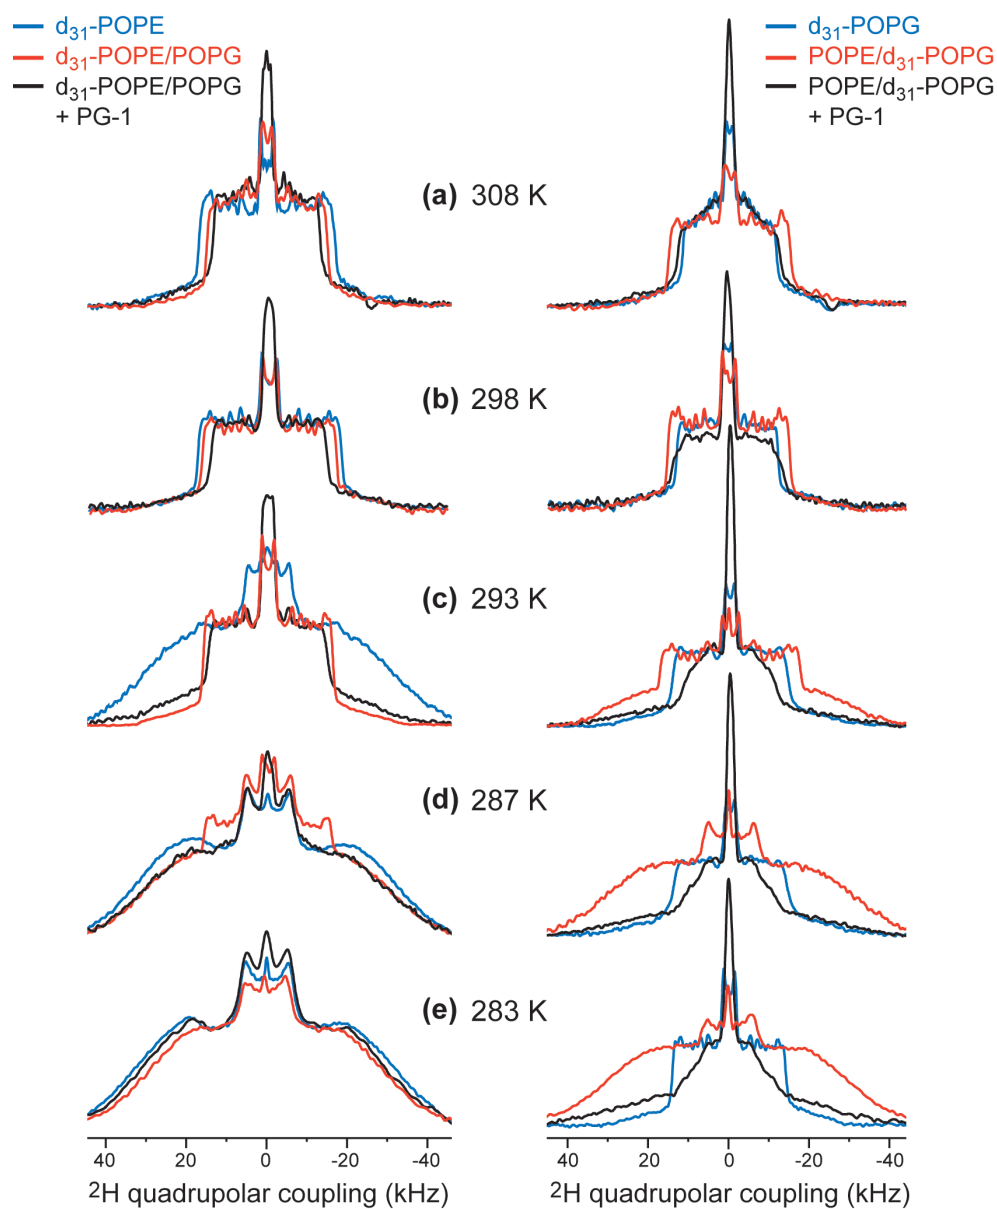

**Figure S2.**  $^2\text{H}$  spectra of  $d_{31}$ -POPE (left column) and  $d_{31}$ -POPG (right column) in lipid membranes without and with PG-1 from 308 K to 283 K. In each panel, the spectra of pure POPE or POPG membrane, the peptide-free POPE/POPG membrane, and the peptide-bound POPE/POPG membrane are superimposed.

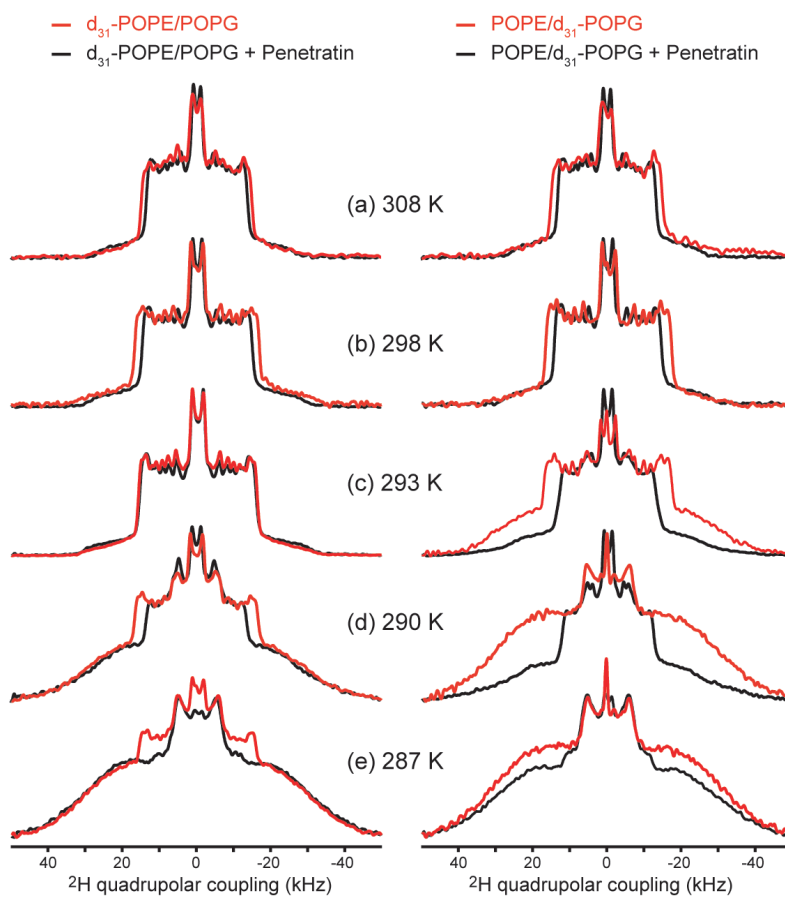

**Figure S3.** Influence of penetratin on the POPE/POPG membrane disorder, as detected from the  $^2\text{H}$  spectra of  $\text{d}_{31}$ -POPE (left column) and  $\text{d}_{31}$ -POPG (right column) at (a) 308 K, (b) 298 K, (c) 293 K, (d) 290 K, and (e) 287 K. Penetratin retained or increased the order of POPE while decreasing the order of POPG between 293 K and 287 K.
